# Supplementary material for: SMRT genome assembly corrects reference errors, resolving the genetic basis of virulence in Mycobacterium tuberculosis
Source: PubMed Central journal article supplement (PMC5393005; doi:10.1186/s12864-017-3687-5), 2017-04-17
Supplement: 12864_2017_3687_MOESM3_ESM.pdf [file 12864_2017_3687_MOESM3_ESM.pdf]

# Expanded Discussion of H37Ra-specific Variants

## 1 Background on Genes

2 Supplementary Table 1 shows the breakdown of the genes affected by reported  
3 “H37Ra-specific” variants (Table 1) by their confirmation status and Tuber-  
4 cuList functional categories [1]. Of the 18 genes adjusted or supported, 7  
5 functional categories are represented. PE\_PPE (6 genes) and intermediary  
6 metabolism (3 genes) comprise half of these genes. This updated polymor-  
7 phism distribution reduces the set of genomic factors potentially causal to the  
8 phenotype of H37Ra, but does not preclude the possibility of multiple distinct  
9 processes contributing.

10 Below, the published information on each of the genes with variants reported  
11 as unique to H37RaJH with respect to H37Ra are reviewed in the context of  
12 our updated assembly. They are subdivided by TubercuList functional category.  
13 Several of the variants in H37RaJH with respect to H37Rv supported by our  
14 assembly (Table 1c, Supplementary Table 1), particularly hypothetical genes,  
15 are not well-studied. These genes, though they should not be excluded from  
16 consideration for conferring the attenuated virulence phenotype to H37Ra, are  
17 not discussed at length in the following subsections.

## 18 Regulatory and information pathways

19 Of the four genes of the regulatory and information pathways classification, our  
20 assembly contradicts the polymorphism upstream of *sigC*, while it corroborates

21 those in *mazG* and *phoP*. We determined that including the variant in *nrdH* in  
22 the set of HC genes by Zheng and colleagues was a mistake, as it is also present  
23 in CDC1551.

#### 24 *sigC*

25 Interestingly, the transversion 51bp upstream of *sigC*, contradicted by our as-  
26 sembly, has been cited as the cause of the differential expression of SigC in the  
27 E phase and in macrophages relative to H37Rv [2, 3], but it appears there in-  
28 stead must be a distal causative factor [4]. The decreased expression of SigC in  
29 macrophage is interesting nonetheless, as its expression is necessary for inducing  
30 murine death [5]. Levels of *sigC* mRNA decrease dramatically in response to  
31 stress [6], which suggests that increased stress in the macrophage environment  
32 in H37Ra may underlie the observed decreased SigC expression in macrophage.

#### 33 Further background on *phoP*

34 Chesne-Seck and colleagues uncovered part of the mechanism through which  
35 this *phoP* polymorphism may affect the phenotype of H37Ra. They showed  
36 that complementation of H37Ra with *phoP* from H37Rv restored synthesis and  
37 production of both sulfolipids (SL) and the acyltrehaloses (ATHLs), but not ph-  
38 thioceryl dimycocerosates (PDIMs), all of which are lacking in H37Ra relative to  
39 H37Rv. This suggests that the mutation upstream of *phoP* leads to diminished  
40 SL and ATHL activity in H37Ra but does not account for the altered activity of  
41 PDIMs. Chesne-Seck et al. used a *pks2-3/4* (polyketide synthetase, a necessary  
42 precursor of SLs and ATHLs) knock-out H37Rv mutant to assess the effects  
43 of the absence of SLs and ATHLs on the virulence of *M. tuberculosis* in mice.  
44 The knockout mutants did not exhibit attenuated virulence, which implicates  
45 that other mechanisms underlie the effect of *phoP* on virulence attenuation of  
46 H37Ra [7].

47 In a study contrasting expression levels between H37Rv and H37Ra grown  
48 in mouse macrophage and nutrient broth, *PhoP* was expressed at higher levels  
49 in H37Ra [8]. Of the 50 genes exhibiting differential expression between the two  
50 media, 12 were under the regulon of *phoP*. Most interestingly, *ppe18*—one of  
51 the 29 contradicted genes, and under the regulon of *phoP*—was underexpressed  
52 in H37Ra relative to H37Rv. A potential explanation for this is that PhoP may  
53 have not been able to bind to the promoter of *ppe18* due to the SNP-induced aa  
54 substitution in the DNA-binding domain of PhoP, which could cause reduced  
55 PPE18 expression [7].

56 The polymorphism in the DNA-binding domain of *phoP* perturbs its au-  
57 toregulation, altering its expression levels in H37Ra [9, 10]. Though evidence  
58 for which direction (positive vs. negative) this point mutation steers the feed-  
59 back loop in H37Ra is equivocal [9, 10], influence in either direction would have  
60 downstream effects on all genes under the regulon of *phoP*. Thus, this mutation  
61 could affect expression of its regulon both as a result of the change in PhoP’s  
62 DNA-binding affinity as well as the resulting change in its concentration due to  
63 autoregulation.

64 A recent study by Solans and colleagues [11] provides greater insight into  
65 the regulatory role of *phoP* by using ChIP-seq and RNAseq to characterize its  
66 regulon. They found that about 2% of the *Mtb* genome is regulated by *phoP*.  
67 Thirty genes were bound by *phoP* directly, while an additional 110 had altered  
68 expression levels, presumably due to amplification in the signal strength of reg-  
69 ulatory cascades initiated by genes under the regulon of *phoP*, such as *espR*,  
70 *whiB1*, *whiB3*, and *whiB6*. Interestingly, *lpdA*—found to have a quintuplication  
71 of a 58-bp region of its promoter in H37Ra (current study), and differentially  
72 expressed in H37Ra relative to H37Rv [4]—appears to be regulated by *phoP*,  
73 but not through the known binding motif of *phoP*. The authors propose that an-

74 other protein may be mediating the interaction between PhoP and the promoter  
75 of *lpdA*. Also of great interest is their finding that PhoP-mediated transcription  
76 of Mcr7, a small nc-RNA, appears to inhibit translation of TatC through oc-  
77 clusion of its ribosomal binding site. Comparing *phoP* mutants to wild-type,  
78 the authors found many putative TAT-secreted substrates to be secreted at sig-  
79 nificantly higher levels in the *phoP*-mutants. TAT-dependent substrates have  
80 been shown to influence immunogenicity. Through RT-qPCR, the authors con-  
81 firmed that Mcr7 is secreted at lower levels in H37Ra. Considering its effect  
82 on secretion of TAT-mediated substrates implicated in immunogenicity, it ap-  
83 pears that immunogenic proteins may be excreted at higher levels in H37Ra  
84 due to the polymorphism in the DNA-binding site of *phoP*. The levels of ESX-  
85 1 proteins under the regulon of *phoP* were unaffected by the differing levels of  
86 Mcr7, implying that the two mechanisms of phoP-mediated phenotypic change  
87 are distinct: lack of ESX-1 protein expression leads to diminished synthesis of  
88 SL and ATHL, while the reduced expression of Mcr7 may reduce the post-  
89 transcriptional repression of Tat proteins, potentially affecting secretion rates  
90 of substrates involved in immunogenicity.

### 91 ***ftsH***

92 Our assembly contradicts the transversion and deletion reported upstream of  
93 *ftsH*, but this does not alter the picture of what contributes to virulence signif-  
94 icantly as it has not, to our knowledge, been implicated in the literature as a  
95 virulence factor of any sort.

### 96 **Cell wall and processes**

97 Our assembly modifies the variant profile of *Rv0039c*, a possible conserved trans-  
98 membrane protein, and *Rv0037c*, a probable conserved membrane protein. Nei-

99 ther *Rv0037c* or *Rv0039c* have been implicated as causal to the unique pheno-  
100 types of H37Ra, so we cannot speculate further on their involvement.

#### 101 *espK*

102 In H37Ra, *espK* has a SNP that results in an M228I amino acid change, the  
103 effect of which may be worth examining. Though *espK* has been characterized  
104 as an ESX-1 secretion associated protein, it has not been implicated in the  
105 attenuated virulence of H37Ra to our knowledge.

#### 106 **Intermediary metabolism**

107 In the intermediary metabolism functional category, our assembly contradicts  
108 polymorphisms in two genes, modifies the variant profile of one gene, and sup-  
109 ports all polymorphisms in four genes.

#### 110 *hadC*

111 The recent work by Slama and colleagues is highly important, as it brings the  
112 truncating frameshift 1-bp insertion of H37Rv into view as one of the largest  
113 contributors to attenuation of virulence in H37Ra compared to H37Rv. It is  
114 especially interesting to note that *hadC* was, until quite recently, considered a  
115 conserved hypothetical gene [12]. This illustrates the importance of experimen-  
116 tally addressing genes with unknown functions.

#### 117 *lpdA*

118 This repeat region is an experimentally confirmed promoter region of *lpdA*. The  
119 additional repeats may alter the affinity with which SigF—a known regulator  
120 of LpdA [13]—binds to the promoter of *lpdA*, which modulates the expression  
121 of LpdA. *lpdA* was also found to be under the regulon of *phoP*, though through

122 a regulatory mechanism other than direct binding to the motif for which the  
123 polymorphism in *phoP* affects the binding affinity [11]. However, the mutation  
124 in *phoP* could still influence LpdA transcription through altered levels of PhoP,  
125 due to autoregulatory effects. Though it is unclear whether the differing copy  
126 numbers between our assembly and that of H37RV, H37RaJH, and the other  
127 H37Rv assemblies were sequencing/assembly errors, or true variation, it is clear  
128 that the copy number of this tandem repeat does not underlie the attenuated  
129 virulence of H37Ra. The observed differential expression of *lpdA* may be due to  
130 altered regulation by PhoP, and may contribute to virulence attenuation—but  
131 not due to copy number variation of the 58bp tandem repeat in the promoter  
132 of *lpdA*.

### 133 *iloD*

134 The contradicted nsSNP in *iloD* eliminates the only variant directly implicated  
135 in amino acid biosynthetic pathways, which suggests that disruption of these  
136 pathways does not contribute significantly to the phenotype of H37Ra.

### 137 *nadD*

138 While the polymorphism in *nadD* was also corroborated and falls in this func-  
139 tional category, it was included erroneously in the HC gene set (Table 1d, Sup-  
140 plementary Table 1). We conclude this because when reproducing Zheng’s re-  
141 sults, we found that this polymorphism was also present in CDC1551, violating  
142 the requirements for the HC gene set [4].

### 143 *plcD*

144 Our assembly confirms the 8kb deletion in H37Rv relative to H37Ra reported in  
145 H37RaJH, which changes the point of disruption of *plcD* from after the 696th bp  
146 in H37Rv to after the 476th bp in H37Ra. *plcD* is a known hotspot for IS6110

147 insertion [14] and strains of H37Rv from other laboratories possess IS6110 in  
148 multiple loci in *plcD* [15]. Therefore, it is unlikely that this difference in *plcD*  
149 disruption contributes to phenotypic differences in H37Ra.

## 150 *pabB*

151 We could find no known mechanism of the corroborated promoter-region transver-  
152 sion 66bp upstream of *pabB*, which encodes a precursor to folate biosynthesis,  
153 contributing to virulence. However, it is worth noting that H37Ra comple-  
154 mented with *pabB* from H37Rv created significantly larger granulomas in skin  
155 lesions of infected rabbits compared to wild-type H37Ra, and that mutations  
156 in *pabB* have been shown to attenuate virulence in the bacterium *Burkholde-*  
157 *ria pseudomallei*, which suggests *pabB* may play a role in virulence yet to be  
158 characterized [4, 16].

## 159 Lipid Metabolism

### 160 *pks12*

161 Disruption of *pks12* would dampen PDIM production, which is one of the lipids  
162 lacking in H37Ra relative to H37Rv [7, 17] and also deficient after excessive  
163 subculturing *in vitro* [18]. In mice, PDIMs have been shown to contribute  
164 to growth, and protect tubercle bacilli from reactive nitrogen species in the  
165 macrophage environment [19]. PDIM production is not under the influence of  
166 *phoP* so, with our refutation of the two SNPs in *phoP*, suggests that there exists  
167 a distinct genomic or epigenomic feature causal to the relative lack of PDIM  
168 expression in H37Ra [7, 20].

169 ***nrp***

170 A nonsense SNP resulting in a truncating stop codon in the *nrp* (non-ribosomal  
171 polyketide synthetase) was supported by our assembly. Transposon mutagenesis  
172 of the *ppe1-nrp* (Rv0096-Rv0101) operon in *M.bovis* resulted in a strain avirulent  
173 in guinea pigs, which suggested *nrp* may play a role in virulence [21, 22].

174 Additionally, this truncation was thought to potentially affect polyketide  
175 synthesis [2]. However, it was later revealed a spontaneous SNP elsewhere in  
176 the genome caused the attenuation, implying that mutagenesis of the *ppe1-*  
177 *nrp* (Rv0096-Rv0101) operon did not confer attenuated virulence to *M.bovis*  
178 [21–23]. Though this weakens the argument for the *nrp* truncation affecting  
179 virulence, it does not necessarily preclude it.

180 **PE\_PPE**

181 Specifically, variants in 3 of 15 *pe\_pgrs* and 3 of 6 *ppe* genes were supported  
182 or adjusted, while the variant in *pe15* was contradicted. While our results dis-  
183 tinguish which H37Ra PE\_PPE genes are polymorphic with respect to H37Rv,  
184 this does not tell the whole story. Of the 5 PE\_PPE family members sup-  
185 ported or modified by our assembly, all were members of PE\_PPE sublineage  
186 V. All five were also present in a proteomic sampling *in vivo* of guinea pig lung  
187 (using mass spectrometry) 90 days following *M.tuberculosis* challenge, of which  
188 four were present 30 days following the challenge as well [24, 25]. Though far  
189 from conclusive, this points to subfamily V members of the PE\_PPE family as  
190 potentially more important in virulence than other PE\_PPE family members,  
191 at least in the case of the differences between H37Rv and H37Ra.

192 Zhang and colleagues [26] used evolutionary genomics to find genes positively  
193 selected for in H37Ra using H37RaJH. They concluded that six genes—four of  
194 which were PE\_PPE family members—were under positive selection. However,



195 we contradicted polymorphisms in three of the four (*pe\_pgrs22*, *ppe13*, and  
196 *pe\_pgrs59*) PE\_PPE genes and found numerous additional polymorphisms in  
197 *pe\_pgrs54*.

198 An *in silico* proteomic study by Kohli and colleagues was also affected greatly  
199 by our updated sequence [27], as our assembly alters the amino acid sequence of  
200 the majority of PE\_PPE genes, which they compared against that of reference  
201 sequence H37Rv to make predictions about structural and functional differences  
202 between PE\_PPE members of the two strains.

### 203 **Hypothetical and Unknown Genes**

204 Our assembly either modified or supported in full four genes with hypothetical  
205 or unknown function. Very little is known about the role the products of these  
206 genes may play in virulence, but their variants in H37Ra with respect to H37Rv  
207 may be worth exploring. None of the hypothetical or unknown genes for which  
208 our assembly contradicted all variants had been implicated in the literature as  
209 critical to virulence.

#### 210 ***Rv0010c***

211 Interestingly, the corroborated variant with respect to H37Rv which affects  
212 *Rv0010c* is an IS6110 element inserted 51bp upstream of the TSS. This is in  
213 range to potentially affect transcription through disruption the promoter region  
214 for *Rv0010c* by separating it from its TSS.

#### 215 ***Rv1006***

216 The supported variant affecting *Rv1006* is a SNP 50bp upstream of its TSS,  
217 which could potentially affect its promoter region and, in turn, its expression.

## 218 Structural Variants

219 In addition to the novel structural variants discussed in the main text, our  
220 assembly also supported several structural variants reported in H37RaJH.

221 Our assembly confirmed the presence of RvD2 in H37Ra, an 8kb region  
222 deleted in H37Rv which has been determined not to contribute to differences in  
223 virulence between H37Ra and H37Rv [28].

224 Strikingly, the tandem duplication of 1728bp within the coding region of  
225 *ppe54* was identical to the 1728bp deletion in *ppe54* of H37RaJH with respect  
226 to H37Rv. To illuminate this curiosity, we examined *ppe54* of several *de novo*  
227 assembled clinical isolates (unpublished data) of various lineages. Surprisingly,  
228 none of the isolates we examined belonging to the Euro-American lineage—the  
229 lineage that H37Ra has been assigned to [29]—had this tandem duplication,  
230 while many of our East Asian isolates did (in preparation). Further, none of the  
231 East Asian isolates with tandem duplications were identical, though they were  
232 highly similar (>99% identity), while the tandem duplication in our assembly  
233 had identical sequences. In light of this, the deletion in H37RaJH is unlikely to  
234 be an assembly error, though we cannot rule out this possibility. If this 1728bp  
235 deletion in H37RaJH is correct, then, by our logic, there are two possibilities.  
236 One is that the tandem duplication arose in H37Ra in culture prior to the last  
237 common ancestor of the culture from which H37RaJH was derived and ours,  
238 and both copies of the 1728bp region were deleted in the culture sequenced by  
239 Zheng and colleagues [4]. The second possibility is that the most recent common  
240 ancestor of H37RaJH and our strain had one copy of the 1728bp region, and both  
241 the deletion in H37RaJH and the tandem duplication in our assembly occurred  
242 after they diverged from one another. The 100% identity between each 1728bp  
243 duplicate of the tandem repeat suggests that the latter scenario is more likely.

## 244 References

- 245 [1] Lew, J.M., Kapopoulou, A., Jones, L.M., Cole, S.T.: TubercuList – 10  
246 years after. *Tuberculosis* **91**(1), 1–7 (2011). doi:10.1016/j.tube.2010.09.008
- 247 [2] Dokladda, K., Billamas, P., Palittapongarnpim, P.: Different be-  
248 haviours of promoters in *Mycobacterium tuberculosis* H37Rv and H37Ra.  
249 *World Journal of Microbiology and Biotechnology* **31**(2), 407–413 (2015).  
250 doi:10.1007/s11274-014-1794-x
- 251 [3] Malhotra, V., Tyagi, J.S., Clark-Curtiss, J.E.: DevR-mediated adap-  
252 tive response in *Mycobacterium tuberculosis* H37Ra: links to asparagine  
253 metabolism. *Tuberculosis (Edinburgh, Scotland)* **89**(2), 169–174 (2009).  
254 doi:10.1016/j.tube.2008.12.003
- 255 [4] Zheng, H., Lu, L., Wang, B., Pu, S., Zhang, X., Zhu, G., Shi, W., Zhang,  
256 L., Wang, H., Wang, S., Zhao, G., Zhang, Y.: Genetic basis of virulence  
257 attenuation revealed by comparative genomic analysis of *Mycobacterium*  
258 *tuberculosis* strain H37Ra versus H37Rv. *PLoS One* **3**(6), 2375 (2008).  
259 doi:10.1371/journal.pone.0002375
- 260 [5] Sun, R., Converse, P.J., Ko, C., Tyagi, S., Morrison, N.E., Bishai, W.R.:  
261 *Mycobacterium tuberculosis* ECF sigma factor sigC is required for lethality  
262 in mice and for the conditional expression of a defined gene set. *Molecular*  
263 *Microbiology* **52**(1), 25–38 (2004). doi:10.1111/j.1365-2958.2003.03958.x
- 264 [6] Manganelli, R., Dubnau, E., Tyagi, S., Kramer, F.R., Smith, I.: Dif-  
265 ferential expression of 10 sigma factor genes in *Mycobacterium tubercu-*  
266 *losis*. *Molecular Microbiology* **31**(2), 715–724 (1999). doi:10.1046/j.1365-  
267 2958.1999.01212.x

- 268 [7] Chesne-Seck, M.-L., Barilone, N., Boudou, F., Asensio, J.G., Kolattukudy,  
269 P.E., Martín, C., Cole, S.T., Gicquel, B., Gopaul, D.N., Jackson, M.: A  
270 point mutation in the two-component regulator PhoP-PhoR accounts for  
271 the absence of polyketide-derived acyltrehaloses but not that of phthiocerol  
272 dimycocerosates in *Mycobacterium tuberculosis* H37Ra. *Journal of Bacteri-*  
273 *ology* **190**(4), 1329–1334 (2008). doi:10.1128/JB.01465-07
- 274 [8] Li, A.H., Waddell, S.J., Hinds, J., Malloff, C.A., Bains, M., Han-  
275 cock, R.E., Lam, W.L., Butcher, P.D., Stokes, R.W.: Contrasting tran-  
276 scriptional responses of a virulent and an attenuated strain of *My-*  
277 *cobacterium tuberculosis* infecting macrophages. *PLoS One* **5**(6) (2010).  
278 doi:10.1371/journal.pone.0011066
- 279 [9] Gonzalo-Asensio, J., Soto, C.Y., Arbués, A., Sancho, J., Menéndez, M.d.C.,  
280 García, M.J., Gicquel, B., Martín, C.: The *Mycobacterium tuberculosis*  
281 *phoPR* Operon Is Positively Autoregulated in the Virulent Strain H37Rv.  
282 *Journal of Bacteriology* **190**(21), 7068–7078 (2008). doi:10.1128/JB.00712-  
283 08
- 284 [10] Gupta, S., Sinha, A., Sarkar, D.: Transcriptional autoregulation by *My-*  
285 *cobacterium tuberculosis* PhoP involves recognition of novel direct repeat  
286 sequences in the regulatory region of the promoter. *FEBS Letters* **580**(22),  
287 5328–5338 (2006). doi:10.1016/j.febslet.2006.09.004
- 288 [11] Solans, L., Gonzalo-Asensio, J., Sala, C., Benjak, A., Uplekar, S.,  
289 Rougemont, J., Guilhot, C., Malaga, W., Martín, C., Cole, S.T.:  
290 The PhoP-dependent ncRNA Mcr7 modulates the TAT secretion sys-  
291 tem in *Mycobacterium tuberculosis*. *PLoS Pathogens* **10**(5) (2014).  
292 doi:10.1371/journal.ppat.1004183

- 293 [12] Slama, N., Jamet, S., Frigui, W., Pawlik, A., Bottai, D., Laval, F., Con-  
294 stant, P., Lemassu, A., Cam, K., Daffé, M., Brosch, R., Eynard, N., Qué-  
295 mard, A.: The changes in mycolic acid structures caused by hadC muta-  
296 tion have a dramatic effect on the virulence of *Mycobacterium tuberculosis*.  
297 *Molecular Microbiology*, (2015). doi:10.1111/mmi.13266
- 298 [13] Akhtar, P., Singh, S., Bifani, P., Kaur, S., Srivastava, B.S., Srivas-  
299 tava, R.: Variable-number tandem repeat 3690 polymorphism in In-  
300 dian clinical isolates of *Mycobacterium tuberculosis* and its influence on  
301 transcription. *Journal of Medical Microbiology* **58**(6), 798–805 (2009).  
302 doi:10.1099/jmm.0.002550-0
- 303 [14] Vera-Cabrera, L., Hernández-Vera, M.A., Welsh, O., Johnson, W.M.,  
304 Castro-Garza, J.: Phospholipase Region of *Mycobacterium tuberculosis*  
305 Is a Preferential Locus for IS6110 Transposition. *Journal of Clinical Micro-*  
306 *biology* **39**(10), 3499–3504 (2001). doi:10.1128/JCM.39.10.3499-3504.2001
- 307 [15] Ioerger, T.R., Feng, Y., Ganesula, K., Chen, X., Dobos, K.M., Fortune,  
308 S., Jacobs, W.R., Mizrahi, V., Parish, T., Rubin, E., Sasseti, C., Sac-  
309 chettini, J.C.: Variation among genome sequences of H37Rv strains of *My-*  
310 *cobacterium tuberculosis* from multiple laboratories. *Journal of Bacteriology*  
311 **192**(14), 3645–3653 (2010). doi:10.1128/JB.00166-10
- 312 [16] Zhang, G., Zhu, B., Shi, W., Wang, M., Da, Z., Zhang, Y.: Evaluation  
313 of mycobacterial virulence using rabbit skin liquefaction model. *Virulence*  
314 **1**(3), 156–163 (2010). doi:10.4161/viru.1.3.11748
- 315 [17] Sirakova, T.D., Dubey, V.S., Kim, H.-J., Cynamon, M.H., Kolattukudy,  
316 P.E.: The Largest Open Reading Frame (pks12) in the *Mycobacterium*  
317 *tuberculosis* Genome Is Involved in Pathogenesis and Dimycocerosyl Ph-

- 318 thiocerol Synthesis. *Infection and Immunity* **71**(7), 3794–3801 (2003).  
319 doi:10.1128/IAI.71.7.3794-3801.2003
- 320 [18] Andreu, N., Gibert, I.: Cell population heterogeneity in *Mycobacterium*  
321 *tuberculosis* H37Rv. *Tuberculosis (Edinburgh, Scotland)* **88**(6), 553–559  
322 (2008). doi:10.1016/j.tube.2008.03.005
- 323 [19] Rousseau, C., Winter, N., Pivert, E., Bordat, Y., Neyrolles, O., Avé, P.,  
324 Huerre, M., Gicquel, B., Jackson, M.: Production of phthiocerol dimy-  
325 cocerosates protects *Mycobacterium tuberculosis* from the cidal activity of  
326 reactive nitrogen intermediates produced by macrophages and modulates  
327 the early immune response to infection. *Cellular Microbiology* **6**(3), 277–  
328 287 (2004). doi:10.1046/j.1462-5822.2004.00368.x
- 329 [20] Asensio, J.G., Maia, C., Ferrer, N.L., Barilone, N., Laval, F., Soto, C.Y.,  
330 Winter, N., Daffé, M., Gicquel, B., Martín, C., Jackson, M.: The virulence-  
331 associated two-component PhoP-PhoR system controls the biosynthesis of  
332 polyketide-derived lipids in *Mycobacterium tuberculosis*. *Journal of Biolog-  
333 ical Chemistry* **281**(3), 1313–1316 (2006). doi:10.1074/jbc.C500388200
- 334 [21] Hotter, G.S., Wards, B.J., Mouat, P., Besra, G.S., Gomes, J., Singh, M.,  
335 Bassett, S., Kawakami, P., Wheeler, P.R., de Lisle, G.W., Collins, D.M.:  
336 Transposon mutagenesis of Mb0100 at the *ppe1-nrp* locus in *Mycobacterium*  
337 *bovis* disrupts phthiocerol dimycocerosate (PDIM) and glycosylphenol-  
338 PDIM biosynthesis, producing an avirulent strain with vaccine properties  
339 at least equal to those of *M. bovis* BCG. *Journal of Bacteriology* **187**(7),  
340 2267–2277 (2005). doi:10.1128/JB.187.7.2267-2277.2005
- 341 [22] Hotter, G.S., Collins, D.M.: *Mycobacterium bovis* lipids: Viru-  
342 lence and vaccines. *Veterinary Microbiology* **151**(1–2), 91–98 (2011).  
343 doi:10.1016/j.vetmic.2011.02.030

- 344 [23] Köser, C.U., Niemann, S., Summers, D.K., Archer, J.A.C.: Overview of  
345 errors in the reference sequence and annotation of *Mycobacterium tuber-*  
346 *culosis* H37Rv, and variation amongst its isolates. *Infection, Genetics and*  
347 *Evolution* **12**(4), 807–810 (2012). doi:10.1016/j.meegid.2011.06.011
- 348 [24] Kruh, N.A., Troutt, J., Izzo, A., Prenni, J., Dobos, K.M.: Portrait of a  
349 Pathogen: The *Mycobacterium tuberculosis* Proteome In Vivo. *PLoS One*  
350 **5**(11) (2010). doi:10.1371/journal.pone.0013938
- 351 [25] Fishbein, S., van Wyk, N., Warren, R.M., Sampson, S.L.: Phylogeny to  
352 function: PE/PPE protein evolution and impact on *Mycobacterium tu-*  
353 *berculosis* pathogenicity. *Molecular Microbiology* **96**(5), 901–916 (2015).  
354 doi:10.1111/mmi.12981
- 355 [26] Zhang, Y., Zhang, H., Zhou, T., Zhong, Y., Jin, Q.: Genes under posi-  
356 tive selection in *Mycobacterium tuberculosis*. *Computational Biology and*  
357 *Chemistry* **35**(5), 319–322 (2011). doi:10.1016/j.compbiolchem.2011.08.001
- 358 [27] Kohli, S., Singh, Y., Sharma, K., Mittal, A., Ehtesham, N.Z., Hasnain, S.E.:  
359 Comparative genomic and proteomic analyses of PE/PPE multigene family  
360 of *Mycobacterium tuberculosis* H37Rv and H37Ra reveal novel and inter-  
361 esting differences with implications in virulence. *Nucleic Acids Research*  
362 **40**(15), 7113–7122 (2012). doi:10.1093/nar/gks465
- 363 [28] Lari, N., Rindi, L., Garzelli, C.: Identification of one insertion site of IS6110  
364 in *Mycobacterium tuberculosis* H37Ra and analysis of the RvD2 deletion in  
365 *M. tuberculosis* clinical isolates. *Journal of Medical Microbiology* **50**(9),  
366 805–811 (2001). doi:10.1099/0022-1317-50-9-805
- 367 [29] Gagneux, S., Small, P.M.: Global phylogeography of *Mycobacterium tu-*  
368 *berculosis* and implications for tuberculosis product development. *The*

369 Lancet. Infectious Diseases **7**(5), 328–337 (2007). doi:10.1016/S1473-  
370 3099(07)70108-1



Table 1: Functional category and confirmation status of genes previously reported as affected by H37Ra-specific mutations

| Status                                      | Functional Category (Count)                 | Gene    |
|---------------------------------------------|---------------------------------------------|---------|
| Contradicted                                | lipid metabolism (1)                        | Rv2048c |
|                                             | information pathways (1)                    | Rv2069  |
|                                             | cell wall and cell wall processes (2)       | Rv0037c |
|                                             |                                             | Rv0383c |
|                                             | insertion seqs and phages (2)               | Rv2649  |
|                                             |                                             | Rv3191c |
|                                             | PE/PPE (16)                                 | Rv0124  |
|                                             |                                             | Rv0279c |
|                                             |                                             | Rv0578c |
|                                             |                                             | Rv0977  |
| Rv1068c                                     |                                             |         |
| Rv1091                                      |                                             |         |
| Rv1196                                      |                                             |         |
| Rv1386                                      |                                             |         |
| Rv1450c                                     |                                             |         |
| Rv1802                                      |                                             |         |
| Rv2098c                                     |                                             |         |
| Rv2396                                      |                                             |         |
| Rv3350c                                     |                                             |         |
| Rv3388                                      |                                             |         |
| Rv3507                                      |                                             |         |
| Rv3595c                                     |                                             |         |
| intermediary metabolism and respiration (6) | Rv0189c                                     |         |
|                                             | Rv1095                                      |         |
|                                             | Rv2068c                                     |         |
|                                             | Rv2202c                                     |         |
|                                             | Rv3303c                                     |         |
| Rv3389c                                     |                                             |         |
| regulatory proteins (1)                     | Rv0880                                      |         |
| conserved hypotheticals (7)                 | Rv1929c                                     |         |
|                                             | Rv2733c                                     |         |
|                                             | Rv2734                                      |         |
|                                             | Rv2825c                                     |         |
|                                             | Rv3031                                      |         |
|                                             | Rv3192                                      |         |
|                                             | Rv3611                                      |         |
| Adjusted                                    | insertion seqs and phages (1)               | Rv1764  |
|                                             | PE/PPE (3)                                  | Rv3343c |
|                                             |                                             | Rv3508  |
| Rv3514                                      |                                             |         |
| Supported                                   | lipid metabolism (1)                        | Rv0101  |
|                                             | cell wall and cell wall processes (3)       | Rv0010c |
|                                             |                                             | Rv0039c |
|                                             |                                             | Rv3879c |
|                                             | PE/PPE (3)                                  | Rv0878c |
|                                             |                                             | Rv1759c |
|                                             |                                             | Rv2352c |
| intermediary metabolism and respiration (4) | Rv0635                                      |         |
|                                             | Rv0637                                      |         |
|                                             | Rv1005c                                     |         |
|                                             | Rv1755c                                     |         |
| regulatory proteins (1)                     | Rv0757                                      |         |
| conserved hypotheticals (2)                 | Rv1006                                      |         |
|                                             | Rv1021                                      |         |
| Erroneous                                   | information pathways (1)                    | Rv3053c |
|                                             | intermediary metabolism and respiration (1) | Rv2421c |

Genes originally reported to be affected by H37Ra-specific mutations [4] were placed into the four groups “contradicted”, “adjusted”, “supported”, and “erroneous” based on replicative analysis and comparisons with our assembly of the H37Ra genome (Main text: Results, Table 1). The genes in each of these four groups are further categorized here by their TubercuList functional categories [1].
